1 **Dual RNase and  $\beta$ -lactamase activity of a single enzyme encoded in most Archaea**

2 Seydina M. Diene<sup>1</sup>, Lucile Pinault<sup>2</sup>, Nicholas Armstrong<sup>2</sup>, Said Azza<sup>2</sup>, Vivek Keshri<sup>1</sup>, Saber  
3 Khelaifia<sup>3</sup>, Eric Chabrière<sup>1</sup>, Gustavo Caetano-Anolles<sup>4</sup>, Jean-Marc Rolain<sup>1,2</sup>, Pierre  
4 Pontarotti<sup>1,5</sup>, Didier Raoult<sup>1,2,3\*</sup>

5

6 **1.** Aix Marseille Univ., MEPHI, IHU-Méditerranée Infection, Marseille, France.

7 **2.** Assistance Publique-Hôpitaux de Marseille (AP-HM), IHU-Méditerranée Infection,  
8 Marseille, France.

9 **3.** IHU-Méditerranée Infection, Marseille, France.

10 **4.** Evolutionary Bioinformatics Laboratory, Department of Crop Sciences, University of  
11 Illinois at Urbana-Champaign, Urbana, IL 61801, USA.

12 **5.** CNRS, Marseille, France.

13

14 **\* Corresponding author:** Prof. Didier Raoult

15 **Address :** MEPHI, IHU-Mediterranee Infection, 19-21 Bd Jean Moulin, 13005 Marseille,  
16 France.

17 **Phone:** (+33) 4 13 73 24 01.

18 **Fax:** (+33) 4 13 73 24 02.

19 **Email:** [didier.raoult@gmail.com](mailto:didier.raoult@gmail.com)

20

21 **Keywords:** archaea, metallo- $\beta$ -lactamases, ribonucleases, glyoxalases, common ancestor  
22 sequence, core genes,

23

## 24 **Abstract**

25           β-lactams targeting the bacterial cell wall are not active on archaea. Here, we figure  
26 out that annotation of genes as β-lactamase in Archaea on the basis of homologous genes,  
27 initially annotated β-lactamases, is a remnant of the identification of the original activities of  
28 this group of enzymes, which in fact, have multiple functions including nuclease,  
29 ribonuclease, β-lactamase, or glyoxalase; which may specialized over time. We expressed a  
30 class B β-lactamase enzyme from *Methanosarcina barkeri* that digest penicillin G. Moreover,  
31 while a weak glyoxalase activity was detected, a significant ribonuclease activity on bacterial  
32 and synthetic RNAs was demonstrated. The β-lactamase activity was inhibited by a β-  
33 lactamase inhibitor (sulbactam), but its RNase activity was not. This gene appears to has  
34 been transferred to the *Flavobacteriaceae* group including *Elizabethkingia* genus in which the  
35 expressed gene shows a more specialized activity toward resistance to tienanmicin but no  
36 glyoxalase activity. The expressed class C-like β-lactamase gene, also from *Methanosarcina*  
37 *sp.*, shows also hydrolysis activity and was more closely related to DD-peptidase enzymes  
38 than known bacterial class C β-lactamases. Our findings highlight the requalification needness  
39 of annotated enzymes as β-lactamases and the specification overtime of multipotent enzymes  
40 in different ways in Archaea and bacteria.

## 41 **Introduction**

42           Antibiotics are part of the microorganism's arsenal in their struggle to master  
43 microbial ecosystems <sup>1</sup>. Most antibiotics are non-ribosomal peptides assembled by  
44 megaenzymes, the non-ribosomal peptide synthetases (NRPS) that have structural motifs  
45 which appear to be among the oldest of the living world <sup>2,3</sup>. In the case of  $\beta$ -lactams, enzymes  
46 named  $\beta$ -lactamases have been so far identified thanks to their hydrolyzing activities on this  
47 antibiotic family. However, annotation of genomes of multiple living species have shown that  
48 homologous sequences to these  $\beta$ -lactamases were present in most living organisms, including  
49 those for which there are no known  $\beta$ -lactam targets as seen in bacteria <sup>4</sup>. This is the case in  
50 human where eighteen genes annotated as metallo- $\beta$ -lactamases have been identified since  
51 1999, some of which, known as for their nuclease and/or ribonuclease activities, exhibited  
52 indeed a  $\beta$ -lactamase activity <sup>5</sup>. In fact, metallo- $\beta$ -lactamase (MBL) enzymes are  
53 characterized by conserved motif (i.e. HxHxDH) and residues shared by all MBL fold  
54 superfamily proteins including  $\beta$ -lactamases, glyoxalase IIs, nucleases, ribonucleases,  
55 flavoproteins, and others <sup>6,7</sup>. The same is true for Archaea, in which two groups of  $\beta$ -  
56 lactamases are present in the majority of Archaea <sup>4</sup>, which are not, by nature, susceptible to  $\beta$ -  
57 lactams, in whom an alternative role of these enzymes may be suspected, in particular that of  
58 nuclease, ribonuclease, or glyoxalase. Specifically to Archaea, there is evidence of transfer  
59 event of class B  $\beta$ -lactamase to a single bacterial groups, i.e. the *Flavobacteriaceae* and  
60 especially *Elizabethkingia* genus, which has an atypical antibiotic resistance profile, including  
61 resistance to thienamycin by an enzymatic mechanism (through GOB and Bla enzymes) <sup>8,9</sup>. It  
62 is highly probable and without presuming that genes annotated as  $\beta$ -lactamases in Archaea  
63 actually supports  $\beta$ -lactamase activity next to other activities used by Archaea. Thus, the  
64 purpose of this work is to express identified archaeal class B and C  $\beta$ -lactamases to measure  
65 its different enzymatic activities.

## 66 **Results**

67 Blast analysis of known bacterial  $\beta$ -lactamase genes such as class A (TEM-24, SHV-  
68 12), class B (VIM-2, NDM-1), class C (CMY-12, AAC-1), and class D (OXA-23, OXA-58)  
69 show no or insignificant results (% identity  $\leq$  24) against the NCBI archaeal database.  
70 However, as described, ancestral sequences are capable of detecting remote homologous  
71 sequences from published biological databases <sup>10</sup>. Consequently, using constructed  
72 phylogenetic trees (cf. suppl. figures) of the four bacterial  $\beta$ -lactamase classes, an ancestral  
73 sequence for each class was inferred. From the four inferred ancestral sequences, homologous  
74 sequences in the archaeal database were identified for the class B and C  $\beta$ -lactamases (**Suppl.**  
75 **fig. S1 and S2**). No significant hits were obtained for the class A and D.

76 **Archaeal Class B metallo- $\beta$ -lactamase.** An archaeal  $\beta$ -lactamase appeared highly  
77 conserved in several classes of archaea including *Archaeoglobi*, *Methanomicrobia*,  
78 *Methanobacteria*, *Thermococci*, *Methanococci*, *Thermoplasmata* and *Thermoprotei* (**fig. 1**;  
79 **Suppl. Table S1**) <sup>11</sup>. To evaluate these archaeal enzymes activity, the protein from  
80 *Methanosarcina barkeri* (gi|851225341; 213 aa; 25.5 kDa)(**fig. 1**; **Suppl. Table S1**) was  
81 experimentally tested. Protein alignment of this latter with known bacterial metallo- $\beta$ -  
82 lactamase proteins reveals conserved motifs/amino acids including Histidine118 (His118),  
83 Aspartic acid 120 (Asp120), His196, and His263, markers of this metallo- $\beta$ -lactamase class B  
84 as previously described <sup>12</sup>(**fig. S3**). Three-dimensional (3D) structure comparison of this  
85 enzyme with known and well characterized proteins in the Phyre2 investigator database  
86 reveals 100% of confidence and 94% of coverage with the crystal structure of the New Delhi  
87 metallo- $\beta$ -lactamase 1 (NDM-1; Phyre2 ID: c3rkjA)(**Suppl. Table S2**). To evaluate these  
88 archaeal enzymes activity, the MetbaB protein from *Methanosarcina barkeri* was  
89 experimentally tested. As expected, this enzyme exhibits a significant hydrolysis activity on

90 nitrocefin (**fig. 2A, 2B**) (with determined kinetic parameters  $k_{cat}=18.2\times 10^{-3} \text{ s}^{-1}$ ,  $K_M=820 \mu\text{M}$   
91 and resulting  $k_{cat}/K_M=22.19 \text{ s}^{-1}.\text{M}^{-1}$ ) and on penicillin G, when measuring its complete  
92 degradation toward a single metabolite i.e. benzyl penilloic acid within three hours (**fig. 2C**).  
93 As shown on **Suppl. Figure S4**, the MetbaB activity was also evaluated in different pH and  
94 was optimal on nitrocefin at pH 7. Furthermore, to confirm the  $\beta$ -lactamase activity of this  
95 enzyme, the combination of nitrocefin with  $\beta$ -lactamase inhibitor sulbactam (at  $1 \mu\text{g}/\text{mL}$ ) was  
96 tested. As shown in **Figure 2A** (column 4), in the presence of sulbactam, no degradation of  
97 the nitrocefin  $\beta$ -lactam could be detected, suggesting a complete inhibition of the archaeal  $\beta$ -  
98 lactamase enzyme. This neutralizing activity was confirmed microbiologically on a  
99 *Pneumococcus* strain highly susceptible to penicillin (MIC = $0.012 \mu\text{g}/\text{ml}$ ) and highly resistant  
100 to sulbactam (MIC = $32 \mu\text{g}/\text{ml}$ ). Indeed, bacteria could grow in the presence of  $0.1 \mu\text{g}/\text{ml}$  of  
101 penicillin incubated with the archaeal  $\beta$ -lactamase, but not when sulbactam was added,  
102 suggesting an inhibition of penicillin G enzymatic digestion (**fig. 2D**).

103 The antibiotic susceptibility testing of a recombinant *E. coli* mutant containing this  
104 Archaeal  $\beta$ -lactamase also revealed a reduced susceptibility to penicillin (from  $1 \mu\text{g}/\text{ml}$  to  $4$   
105  $\mu\text{g}/\text{ml}$ ) (data not shown). Interestingly, it appears that these Archaeal  $\beta$ -lactamases are closely  
106 related to bacterial enzymes known as “GOB” (AF090141), which are fully functional in vivo  
107 and present in a single bacterial family i.e. *Flavobacteriaceae*, especially in *Elizabethkingia*  
108 genus<sup>8,13</sup> (**fig. 1 and suppl. fig. S5**). Indeed, we expressed the *bla*<sub>GOB-13</sub> gene (AY647250)  
109 into *E. coli* BL21 strain and detected by LC-MS a full hydrolysis of imipenem by this enzyme  
110 through the accumulation of its metabolite (i.e. imipenemoic acid) over the time (**suppl. fig.**  
111 **S6**). As expected, the MetbaB enzyme hydrolyze also efficiency imipenem since its  
112 imipenemoic acid metabolite was detected after 24h (**suppl. fig S6**). Specific activities of  
113 GOB-13 and MetbaB enzymes were detected in the same order of magnitude on  $1 \text{ mM}$  of  
114 nitrocefin, which were  $66 \text{ mU}/\text{mg}$  and  $24 \text{ mU}/\text{mg}$  respectively.

115           However, the MBL protein sequences of this bacterial genus compared to those of  
116   Archaea reveal low similarities (less than 36%) and this therefore suggests an ancient HGT  
117   from an archaic phylum to this bacterial group, which furthermore exhibited natural  $\beta$ -lactam  
118   hydrolysis activity, previously considered to be fairly atypical for a bacterium (**Suppl. Table**  
119   **S3**). Thus, because archaea are resistant to  $\beta$ -lactams, the role of these  $\beta$ -lactamases in these  
120   microorganisms may be the digestion of  $\beta$ -lactams to use it as a carbon source, as reported in  
121   the literature in bacteria <sup>14</sup>.

122           **Characterization of the DNase and RNase activities:** As reported in the literature,  
123   MBL fold enzymes can have diverse functions such as nuclease, ribonuclease, and/or  
124   glyoxalase activities <sup>6,7</sup>. We tested here, the nuclease, ribonuclease, and glyoxalase activity of  
125   the expressed MetbaB enzyme. As presented on **Figure 3A**, while no nuclease activity on  
126   single and double-stranded DNAs was detected, extracted bacteria RNA (i.e. *E. coli* BL21  
127   strain) was hydrolyzed by the archaeal MetbaB enzyme (**fig. 3B**). Moreover, using the  
128   RNaseAlert QC system kit able to detect unambiguously a real RNase activity, we were able  
129   to confirm the MetbaB RNase activity with an average activity estimated to 0.359 mU/mg  $\pm$   
130   0.107 (**fig. 3C**). Interestingly, in contrast, to  $\beta$ -lactamase activity, the MetbaB RNase activity  
131   was not inhibited by the  $\beta$ -lactamase inhibitor, i.e. sulbactam (**Fig. 3B**).

132           **Glyoxalase activity:** As presented on **Suppl. Figure S5**, the phylogenetic tree analysis  
133   shows that glyoxalase II sequences from bacteria and Eukarya appeared significantly related  
134   to archaeal MBL sequences. Base on that, the putative glyoxalase II activity of the MetbaB  
135   enzyme was then investigated. We were able to detect a weak activity of 3 mU/mg, using the  
136   Glyoxalase II activity kit from BioVision (Milpitas, CA, USA) (data not shown).

137           **Archaeal class C-like  $\beta$ -lactamases:** Four significant sequences homologous to  
138   bacterial class C  $\beta$ -lactamase sequences were identified in archaea database using the inferred  
139   bacterial class C ancestor sequence (**fig. 4; Suppl. Table S1**). The phylogeny analysis shows

140 that this third-class C-like of  $\beta$ -lactamases appears to be a very old class, a putative new clade,  
141 which cannot be identified without the reconstruction of the common ancestor (**fig. 4**). As  
142 shown in this figure, this class C-like enzyme appears more closely related to DD-peptidase  
143 enzymes than the known bacterial class C  $\beta$ -lactamases. Protein alignment reveals the same  
144 conserved and signature motifs ( $S^{64}XXK$  and  $Y^{150}XN$ ) identified in bacterial class C  $\beta$ -  
145 lactamase (**Suppl. fig. S7**). Moreover, DD-peptidase enzymes can exhibit significant  $\beta$ -  
146 lactamase activity (10-fold higher  $\beta$ -lactams resistance) through punctual mutations in the  
147 coding sequence<sup>15</sup>. The three-dimensional (3D) structure comparison of this archaeal class C-  
148 like enzyme with known and well characterized proteins in the Phyre2 investigator database  
149 reveals 100% of confidence and 66% of coverage with the crystal structure of the octameric  
150 penicillin-binding protein (PBP) homologue from *pyrococcus abyssi* (Phyre2 ID: c2qmiH)  
151 (**Suppl. Table S2**). Similarly, the identified archaeal enzyme of this class C (gi|919167542)  
152 was also cloned in *E. coli* and found to be active in enzymatic level by hydrolyzing the  
153 nitrocefin (data not shown). This enzymatic activity was also confirmed by the kinetic assays  
154 showing the catalytic parameters  $k_{cat}=9.67\times 10^{-3} s^{-1}$ ,  $K_m=583.6 \mu M$  and  $k_{cat}/K_m=16.57 s^{-1} M^{-1}$ ,  
155 according to Michaelis-Menten equation fitting ( $R^2=0.984$ ). However, the  $\beta$ -lactams  
156 susceptibility testing of the recombinant *E. coli* strains harboring this sequence reveals no  
157 reduced susceptibility as compared to the control *E. coli* strains.

158

## 159 Discussion

160 In this study, we show that the activity of an Archaeal enzyme was triple including  $\beta$ -  
161 lactamase, ribonuclease, and glyoxalase and the annotation corresponding to only one of these  
162 activities is biologically unsatisfactory. The archaea microorganisms, in which the tested  $\beta$ -  
163 lactamase was identified (*Methanosarcina barkeri*), are fully resistant to all  $\beta$ -lactam  
164 antibiotics. This archaeal species has the largest genomes in the Archaea kingdom because of  
165 a massive horizontal gene transfer (HGT) from bacteria <sup>16</sup>. The identified class B  $\beta$ -lactamase  
166 sequences appear highly conserved and widespread in Archaea as previously reported using  
167 the hidden Markov model (HHM)-based profile <sup>11</sup> and sequence transfer events have been  
168 observed into single bacterial family and particularly in *Elizabethkingia* genus, which has one  
169 of the largest spectrum of resistance to  $\beta$ -lactams known so far. In the current literature  
170 emerges evidence that  $\beta$ -lactamase enzymes, especially class B metallo- $\beta$ -lactamase  
171 superfamily, have various activities such as  $\beta$ -lactamase, nuclease, ribonuclease, and  
172 glyoxalase <sup>6,17,18</sup> (**Suppl. fig. S5**), which could justify the existence of enzymes in archaea  
173 acting also as  $\beta$ -lactamases. It has been reported that MBL enzyme superfamily exhibit a  
174 landscape of crossed activities, since each enzyme has on average 1.5 catalytic reactions in  
175 addition to its native activity <sup>19</sup>. Here, we were able to demonstrate that expressed archaeal  $\beta$ -  
176 lactamase enzyme (class B  $\beta$ -lactamase) can have triple activities ( $\beta$ -lactamase, ribonuclease,  
177 and glyoxalase). While the RNase activity was not inhibited by a  $\beta$ -lactamase inhibitor  
178 (sulbactam), the antibiotic hydrolyzing activity was inhibited by this inhibitor, a drug  
179 commonly used, in treatment of human infections, to inhibit bacterial  $\beta$ -lactamases <sup>20</sup>. The  
180 consequences of inhibiting the activities of these enzymes in the physiology of host organisms  
181 is an area that remain to be explored. On the basis of our findings, the role of  $\beta$ -lactamase like  
182 enzymes in Archaea appears not yet totally understood. There is confusion between the  
183 annotation of nucleases/ribonucleases and  $\beta$ -lactamase enzymes. Both activities can be



184 conserved in archaea and this is likely to demonstrate the ancient origin of MBL nucleases  
185 first and secondly, the risk of false annotation from the first identified enzymatic activity of  
186 the newly identified enzymes. Our findings suggest that archaeal  $\beta$ -lactamases are as ancestral  
187 as those of bacteria, and HGT events have occurred from archaea to bacteria, where enzymes  
188 can be specialized to other roles for more efficiency, like observed in *Elizabethkingia*. As  
189 presented in **Suppl. Figure S8**, we propose a putative evolution scenario of enzymatic  
190 activities of MBLs in which ancestor MBL sequence has best hit protein in PDB (Protein  
191 Database Bank), a glyoxalase II (1XM8\_A) exhibiting two different metal ions (Fe and Zn) in  
192 his catalytic site. Its evolution over the time resulted to (i) archaeal MBLs, e.g. MetbaB which  
193 matches in PDB with a MBL superfamily fold (AZZI\_A) exhibiting only Fe ions in his  
194 catalytic site and has different enzymatic activities as shown in our present study and (ii)  
195 bacterial GOB enzymes (K0W\_A) bearing only Zn ions for an activity more specific and  
196 more efficient against  $\beta$ -lactam antibiotics.

197 Finally, the existence of enzymes in the world of archaea with multiple activities such  
198 as  $\beta$ -lactamase, ribonuclease, and glyoxalase, is showing that  $\beta$ -lactamase enzymes are not  
199 only a defense system against  $\beta$ -lactam antibiotics. The use of antibiotics as a nutriment  
200 sources for archaea as key to degrade  $\beta$ -lactam molecules and use them as carbon sources as  
201 described in bacteria, is a plausible hypothesis <sup>14,21–23</sup>.

202

## 203 **Materials and Methods**

### 204 **Sequence analysis:**

205 A total of 1,155 amino acid sequences were retrieved (Class A: 620; B: 174; C: 151,  
206 and D: 210) from the ARG-ANNOT database <sup>24</sup>. The phylogenetic trees were inferred using  
207 the approximate maximum-likelihood method in FastTree <sup>25</sup>. For a detailed and  
208 comprehensive diversity analysis, a few sequences from each clade of the trees were selected  
209 as representatives of the corresponding clades (labeled in red in **Suppl. fig. S1 and S2**).

210 The ancestral sequence was inferred using the maximum-likelihood method conducted  
211 by MEGA6 <sup>26</sup> software. Then, these ancestral sequences were used as queries in a BlastP <sup>27</sup>  
212 search ( $\geq 30\%$  sequence identity and  $\geq 50\%$  query coverage) against the NCBI-nr archaeal  
213 database. For Class C  $\beta$ -lactamase analysis, DD-peptidase sequences (penicillin binding  
214 proteins) were downloaded from the NCBI database. 2515 sequences were selected for local  
215 Blast analysis with the archaeal Class C-like  $\beta$ -lactamase used as query sequence (gi|  
216 919167542). From this analysis, 24 DD-peptidase sequences were identified as homologous  
217 to the query and thus used for further phylogenetic tree analysis. The selected archaeal  
218 sequences were aligned with known bacterial  $\beta$ -lactamase sequences (representative  
219 sequences of a known clade from the guide tree) using the multiple sequence alignment  
220 algorithm MUSCLE <sup>28</sup> and the phylogenetic tree was inferred using FastTree <sup>25</sup>.

### 221 **Antibiotic susceptibility testing**

222 The antibiotic susceptibility testing of two *Methanosarcina* (*barkeri* and sp.) isolates  
223 was performed on 15 antibiotics including ampicillin, ampicillin/sulbactam, penicillin,  
224 piperacillin, piperacillin/tazobactam, cefoxitin, ceftriaxone, ceftazidime imipenem,  
225 meropenem, aztreonam, gentamicin, ciprofloxacin, amikacin, and trimethoprim-  
226 sulfamethoxazole (I2a, SirScan Discs, France). A filtered aqueous solution of each antibiotic

227 was prepared anaerobically in a sterilized Hungate tubes at concentration of 5 mg/ml. Then,  
228 0.1 ml of each one of these solutions was added to a freshly inoculated culture tube containing  
229 4.9 ml of the tested stain to obtain a final concentration of 100 $\mu$ g/ml for each antibiotic herein  
230 tested. The mixture of antibiotic and archaeal culture was then incubated at 37°C and the  
231 growth of archaea was observed after 5 to 10 days incubation depending on the tested strain.  
232 Control cultures without antibiotic were also incubated in the same conditions to assess the  
233 strain growth and non-inoculated culture tubes were used as negative control.

#### 234 **In vitro assessment of the $\beta$ -lactamase activity:**

235 **Protein expression and purification:** Genes encoding the selected  $\beta$ -lactamases  
236 including the *Methanosarcina* class B  $\beta$ -lactamase protein (gi|851225341), class C-like  $\beta$ -  
237 lactamase protein (gi|919167542) and the *Elizabethkingia* GOB-13 (AY647250) were  
238 synthesized by GenScript (Piscataway, NJ, USA) and optimized for protein expression in  
239 *Escherichia coli* in the pET24a(+) expression vector. The details of this protein expression  
240 and purification of the recombinant proteins are previously described<sup>29</sup>. Purified proteins  
241 were then subjected to  $\beta$ -lactamase activity detection as previously described using nitrocefin  
242 and penicillin in presence and absence of sulbactam<sup>29</sup>. Furthermore, the activity of MetbaB  
243 enzyme was evaluated at different pH (between pH7 and pH10) using the same nitrocefin  
244 assay conditions. The kinetic parameters of the MetbaB enzyme were determined using the  
245 same conditions as previously reported<sup>29</sup>. In addition to performed analyses described below,  
246 the  $\beta$ -lactam hydrolysis activity was monitored by Liquid Chromatography-Mass  
247 Spectrometry (LC-MS) on penicillin G and imipenem in presence and absence of the  $\beta$ -  
248 lactamase inhibitor, i.e. sulbactam as we described previously<sup>29</sup>.

#### 249 **Imipenem antibiotic degradation monitored by Liquid Chromatography-Mass**

250 **Spectrometry (LC-MS):** A stock solutions at 10 mg/ml of Imipenem and Cilastatine was  
251 freshly prepared in water from the perfusion mixture of both compounds (500 mg/500 mg ;  
252 Panpharma, Luitre, France). 100  $\mu$ L of GOB-13 and MetbaB enzyme solutions at 1 mg/mL  
253 were spiked with Imipenem/Cilastatine at final concentrations of 10  $\mu$ g/ml, then incubated at  
254 room temperature. Negative controls consisted of PBS spiked with Imipenem/Cilastatine.  
255 Triplicate samples were prepared and for each replicate 30  $\mu$ L of solution was collected at 0, 4  
256 and 24 hours. Then, 70  $\mu$ L of acetonitrile was added to each sample, and tubes were vortexed  
257 10 minutes at 16000 g to precipitate proteins. The clear supernatant was collected for analysis  
258 using an Acquity I-Class UPLC chromatography system connected to a Vion IMS Qtof ion  
259 mobility-quadrupole-time of flight mass spectrometer as previously described (**Reference**)  
260 with modifications. For each sample stored at 4°C, 10  $\mu$ L was injected into a reverse phase  
261 column (Acquity BEH C18 1.7  $\mu$ m 2.1x50 mm, Waters) maintained at 50°C. Compounds  
262 were eluted at 0.5 ml/min using water and acetonitrile solvents each containing 0.1% formic  
263 acid. The following composition gradient was used: 5% during 1 minute to 70% acetonitrile,  
264 95 % acetonitrile for a 1-minute wash step, and back to the initial composition for 1-minute.  
265 Compounds were ionized in the positive mode using a Zspray electrospray ion source with the  
266 following parameters: capillary/cone voltages 2.5/40V, and source/desolvation temperatures  
267 120/450°C. Ions were then monitored using a High Definition MS(E) data independent  
268 acquisition method with the following settings: travelling wave ion mobility survey, 50-1000  
269 m/z, 0.1 s scan time, 6 eV low energy ion transfer, and 20-40 eV high energy for collision-  
270 induced dissociation of all ions (low/high energy alternate scans). Mass calibration was  
271 adjusted within each run using a lockmass correction (Leucin Enkephalin 556.2766 m/z). The  
272 Vion instrument ion mobility cell and time-of-flight tube were calibrated beforehand using a  
273 Major Mix solution (Waters) to calculate collision cross section (CCS) values from ion  
274 mobility drift times and mass-to-charge ratios. 4D peaks, corresponding to a chromatographic

275 retention time, ion mobility drift time and parents/fragments masses, were then collected from  
276 raw data using UNIFI software (version 1.9.3, Waters). As reported, the lactam ring of  
277 Imipenem can be hydrolyzed to form the Imipenemoic acid structure. A list of known  
278 chemical structures including Imipenem, Imipenemoic acid and Cilastatine were targeted with  
279 the following parameters: 0.1 minutes retention time window, 5 % CCS tolerance, 5 ppm m/z  
280 tolerance on parent adducts (H<sup>+</sup> and Na<sup>+</sup>) and 10 mDa m/z tolerance on predicted fragments.  
281 Retention times and CCS values were previously measured from antibiotics standards in order  
282 to perform subsequent accurate structures screening (Imipenem: 0.3 minutes/169 Å<sup>2</sup> ;  
283 Imipenemoic acid: 1.8 minutes/242 Å<sup>2</sup>). The MS Responses of Imipenem and Imipenemoic  
284 acid were normalized using the MS Response of Cilastatine (ratio) for data interpretation.  
285 Phase I chemical transformations were also screened against the raw data and showed that the  
286 hydrolysis (Imipenemoic acid) was an abundant metabolite in the case of GOB-13and  
287 MetbaB.

#### 288 **DNase and RNase activity evaluation:**

289 To evaluate the DNase activity of the MetbaB enzyme, synthesized single-stranded  
290 forward and reverse DNAs and double-stranded DNA of 130-bp were used as substrates.  
291 Double-stranded DNA was obtained by annealing forward and reverse single-stranded DNAs  
292 in thermocycler at temperatures decreasing from 95°C to 25°C during 1 h. Moreover, the  
293 RNase activity was assessed using the RNaseAlert QC System kit (Fisher Scientific, Illkirch,  
294 France). This assay uses a fluorescence-quenched oligonucleotide probe as substrate that  
295 emits a fluorescent signal in the presence of RNase activity. Fluorescence was monitored  
296 continuously at 37°C for 1h by a Synergy HT plate reader (BioTek Instruments SAS, Colmar,  
297 France) with a 485/528 nm filter set. The RNase activity was then determined using supplied  
298 RNase A used as a standard (10 mU/mL). In addition to the tested RNaseAlert QC system kit,  
299 based on a synthetic RNA, purified *Escherichia coli* RNA using RNeasy columns (Invitrogen,

300 Carlsbad, CA, USA) was also tested. Enzymatic reactions were performed by incubating each  
301 RNA samples with 15  $\mu$ g of expressed MetbaB protein in Tris-HCl buffer 50 mM, pH 8.0,  
302 sodium chloride 0.3 M, using a final volume of 20  $\mu$ L at 30°C for 2 h. After incubation, the  
303 material was loaded onto denaturing PolyAcrylamide Gel Electrophoresis (dPAGE) at 12% or  
304 analyzed using the Agilent RNA 6000 Pico LabChip kit on an Agilent 2100 Bioanalyzer  
305 (Agilent Technology, Palo Alto, CA, USA). Of course, RNase activities were assayed in the  
306 absence or presence of 10 $\mu$ g/mL of sulbactam. Negative controls were made with all used  
307 reagents (RNase free water, enzyme buffer) but also with bacterial culture without expression  
308 vector containing *metbaB* gene. Each experiment was performed at least in triplicate.

### 309 **Glyoxalase II Activity assay:**

310 Glyoxalase II (GloII) activity assays were performed using the Glyoxalase II Activity  
311 kit from BioVision (Milpitas, CA, USA) and monitored with a Synergy HT microplate reader  
312 (BioTek, Winooski, VT, USA). Reactions were carried out in triplicate at room temperature  
313 in a 96-well plate with a final volume of 100  $\mu$ L for each well. Degradation of the GloII  
314 substrate was monitored for 40 minutes following absorbance variations at 450 nm,  
315 corresponding to the production of D-Lactate that reacts with a chromophore provided in the  
316 reaction mix. A D-Lactate Standard curve was plotted and allowed quantification of produced  
317 D-Lactate with our enzyme and calculation of its specific activity.

318

319 **Acknowledgements**

320 Financial support from the IHU Mediterranee Infection, Marseille France and  
321 American Journal Experts (AJE) for English corrections of the manuscript are gratefully  
322 acknowledged.

323

324 **Author contributions:**

325 Didier Raoult. conceived and designed the study. Seydina M. Diene, Lucile Pinault,  
326 Vivek Keshri, Nicholas Armstrong, Said Azza, Saber Khelaifia, Eric Chabrière, Jean-Marc  
327 Rolain, Pierre Pontarotti, and Didier Raoult analysed and interpreted data. Seydina M. Diene,  
328 Lucile Pinault, Vivek Keshri, Nicholas Armstrong, Said Azza, Gustavo Caetano-Anolles, Eric  
329 Chabrière, Jean-Marc Rolain, Pierre Pontarotti, and Didier Raoult drafted the manuscript  
330 and/or made critical revisions. All of the authors read and approved the final manuscript.

331

332 **Funding:**

333 This work was supported by the French Government under the “Investments for the  
334 Future” program managed by the National Agency for Research (ANR), Méditerranée-  
335 Infection and was also supported by Région Provence Alpes Côte d’Azur and European  
336 funding FEDER PRIMMI (Fonds Européen de Développement Régional - Plateformes de  
337 Recherche et d’Innovation Mutualisées Méditerranée Infection).

338

339 **Competing interests:**

340 We declare that we have no conflicts of interest.

341

## References

- 342 1. Hibbing, M. E., Fuqua, C., Parsek, M. R. & Peterson, S. B. Bacterial competition: surviving  
343 and thriving in the microbial Jungle. *Natl. Rev. Microbiol.* **8**, 15–25 (2010).
- 344 2. Caetano-Anollés, G., Kim, K. M. & Caetano-Anollés, D. The phylogenomic roots of modern  
345 biochemistry: Origins of proteins, cofactors and protein biosynthesis. *J. Mol. Evol.* **74**, 1–34  
346 (2012).
- 347 3. Caetano-Anollés, D., Kim, K. M., Mittenthal, J. E. & Caetano-Anollés, G. Proteome evolution  
348 and the metabolic origins of translation and cellular life. *J. Mol. Evol.* **72**, 14–33 (2011).
- 349 4. Keshri, V. *et al.* Phylogenomic Analysis of  $\beta$ -Lactamase in Archaea and Bacteria Enables the  
350 Identification of Putative New Members. *Genome Biol. Evol.* **10**, 1106–1114 (2018).
- 351 5. Pettinati, I., Brem, J., Lee, S. Y., McHugh, P. J. & Schofield, C. J. The Chemical Biology of  
352 Human Metallo- $\beta$ -Lactamase Fold Proteins. *Trends Biochem. Sci.* **41**, 338–355 (2016).
- 353 6. Aravind L. An evolutionary classification of the metallo- $\beta$ -lactamase fold proteins. *Silico Biol*  
354 **1**, 69–91 (1999).
- 355 7. Bebrone, C. Metallo- $\beta$ -lactamases (classification, activity, genetic organization, structure, zinc  
356 coordination) and their superfamily. *Biochem. Pharmacol.* **74**, 1686–1701 (2007).
- 357 8. Horsfall, L. E. *et al.* Broad antibiotic resistance profile of the subclass B3 metallo- $\beta$ -lactamase  
358 GOB-1, a di-zinc enzyme. *FEBS J.* **278**, 1252–1263 (2011).
- 359 9. Rossolini, G. *et al.* Characterization and sequence of the *Chryseobacterium (Flavobacterium)*  
360 *meningosepticum* carbapenemase: a new molecular class B  $\beta$ -lactamase showing a broad  
361 substrate profile. *Biochem. J* **332**, 145–152 (1998).
- 362 10. Sharma, V., Colson, P., Giorgi, R., Pontarotti, P. & Raoult, D. DNA-Dependent RNA  
363 Polymerase Detects Hidden Giant Viruses in Published Databanks. *Genome Biol. Evol.* **6**,  
364 1603–10 (2014).
- 365 11. Vivek Keshri, Arup Panda, Anthony Levasseur, Jean-Marc Rolain, Pierre Pontarotti, D. R.  
366 Phylogenomic analysis of  $\beta$ -lactamases in archae and bacteria enables the identification of  
367 putative new members. *Genome Biol. Evol.* **10**, 1106–1114 (2018).
- 368 12. Bush, K. The ABCD's of  $\beta$ -lactamase nomenclature. *J. Infect. Chemother.* **19**, 549–559 (2013).
- 369 13. Opota, O. *et al.* Genome of the carbapenemase-producing clinical isolate *Elizabethkingia*  
370 *miricola* EM\_CHUV and comparative genomics with *Elizabethkingia meningoseptica* and  
371 *Elizabethkingia anophelis*: evidence for intrinsic multidrug resistance trait of emerging  
372 pathogens. *Int. J. Antimicrob. Agents* **1**, 93–97 (2016).
- 373 14. Crofts, T. S. *et al.* Shared strategies for  $\beta$ -lactam catabolism in the soil microbiome. *Nat. Chem.*  
374 *Biol.* **14**, 556–564 (2018).
- 375 15. Peimbert, M. & Segovia, L. Evolutionary engineering of  $\beta$ -lactamase activity on a D-Ala D-  
376 Ala transpeptidase fold. *Protein Engineering* **16**, 27–35 (2003).
- 377 16. Deppenmeier, U. *et al.* The Genome of *Methanosarcina mazei*: Evidence for Lateral Gene  
378 Transfer Between Bacteria and Archaea JMMB Research Article. *J. Mol. Microbiol.*  
379 *Biotechnol* **4**, 453–461 (2002).
- 380 17. Dominski, Z. Nucleases of the Metallo- $\beta$ -lactamase Family and Their Role in DNA and RNA  
381 Metabolism. *Crit. Rev. Biochem. Mol. Biol.* **42**, 67–93 (2007).
- 382 18. Fischer, S. *et al.* Assigning a function to a conserved archaeal metallo- $\beta$ -lactamase from  
383 *Haloferax volcanii*. *Extremophiles* **16**, 333–343 (2012).



- 384 19. Baier, F. & Tokuriki, N. Connectivity between catalytic landscapes of the metallo- $\beta$ -lactamase  
385 superfamily. *J. Mol. Biol.* **426**, 2442–2456 (2014).
- 386 20. Adnan, S., Paterson, D. L., Lipman, J. & Roberts, J. A. Ampicillin/sulbactam: Its potential use  
387 in treating infections in critically ill patients. *Int. J. Antimicrob. Agents* **42**, 384–389 (2013).
- 388 21. Woappi, Y., Gabani, P., Singh, A. & Singh, O. V. Antibiotrophs: The complexity of antibiotic-  
389 subsisting and antibiotic-resistant microorganisms. *Crit. Rev. Microbiol.* **42**, 17–30 (2016).
- 390 22. González, T. de J. B., Zuidema, T., Bor, G., Smidt, H. & van Passel, M. W. J. Study of the  
391 aminoglycoside subsistence phenotype of bacteria residing in the gut of humans and zoo  
392 animals. *Front. Microbiol.* **6**, 1–7 (2016).
- 393 23. Xin, Z. *et al.* Isolation, identification and characterization of human intestinal bacteria with the  
394 ability to utilize chloramphenicol as the sole source of carbon and energy. *FEMS Microbiol.*  
395 *Ecol.* **82**, 703–712 (2012).
- 396 24. Gupta, S. K. *et al.* ARG-ANNOT, a new bioinformatic tool to discover antibiotic resistance  
397 genes in bacterial genomes. *Antimicrob. Agents Chemother.* **58**, 212–20 (2014).
- 398 25. Price, M. N., Dehal, P. S. & Arkin, A. P. FastTree 2--approximately maximum-likelihood trees  
399 for large alignments. *PLoS One* **5**, e9490 (2010).
- 400 26. Tamura, K., Stecher, G., Peterson, D., Filipowski, A. & Kumar, S. MEGA6: Molecular  
401 evolutionary genetics analysis version 6.0. *Mol. Biol. Evol.* **30**, 2725–2729 (2013).
- 402 27. Altschul, S. F., Gish, W., Miller, W., Myers, E. W. & Lipman, D. J. Basic Local Alignment  
403 Search Tool. *J. Mol. Biol.* **215**, 403–410 (1990).
- 404 28. Edgar, R. C. MUSCLE: Multiple sequence alignment with high accuracy and high throughput.  
405 *Nucleic Acids Res.* **32**, 1792–1797 (2004).
- 406 29. Diene, S. M. *et al.* Human metallo- $\beta$ -lactamase enzymes degrade penicillin. *Sci. Rep.* **9**, 12173  
407 (2019).

408

## Figure legends

409 **Figure 1:** Phylogenetic Tree of Class B  $\beta$ -lactamases from archaea and bacteria. Archaeal  
410 sequence colored in green is which expressed and experimentally tested. Bacterial  $\beta$ -lactamase  
411 sequences are colored in red whereas archaeal sequences are colored in blue.

412 **Figure 2:** Characterization of the archaeal class B MBL (MetbaB) identified in  
413 *Methanosarcina barkerii*. **(A and B):**  $\beta$ -lactamase activity of the *M. barkerii* Class B MBL  
414 enzyme (MetbaB) on a chromogenic cephalosporin substrate (Nitrocefin). **A1 and A2** refer to  
415 the nitrocefin degradation test using the BBL™ Cefinase™ paper disc respectively at t=0 and  
416 t=30 min. **A3** refers to this same test performed in liquid medium in the absence of sulbactam  
417 while **A4**, with the addition of 1  $\mu$ g/ml sulbactam, both after 30 minutes of incubation; **(B)**  
418 monitored nitrocefin degradation by following the absorbance at 486 nm over time in the  
419 presence and absence of the  $\beta$ -lactamase inhibitor. **(C):** LC/MS average relative response of  
420 screened metabolite compounds of penicillin G in the presence the *M. barkerii* Class B MBL  
421 enzyme monitored for three hours. Penicillin G (in orange) refers to the intact form of the  
422 antibiotic while penilloic acid (in purple) and penillic acid (in light blue) refer to the penicillin  
423 G metabolites. Penicillin G control in PBS did not show any degradation towards any  
424 metabolite (data not shown). **(D),** Microbiological test of the mixture of penicillin G (0.1  
425  $\mu$ g/ml) with the MetbaB enzyme in the presence and absence of sulbactam (15  $\mu$ g/ml) on a  
426 *Pneumococcus* strain highly susceptible to penicillin G (MIC= 0.012  $\mu$ g/ml) and highly  
427 resistant to sulbactam (MIC= 32  $\mu$ g/ml). The halo around holes 1 and 5 reveals growth  
428 inhibition of the *Pneumococcus* strain. The absence of this halo around holes 2, 3, and 4  
429 means no effect of the mixture on the *Pneumococcus* growth could be observed.

430 **Figure 3:** Evaluation of the DNase and RNase activity of the archaeal MetbaB enzyme.  
431 **(A):** Effect of MetbaB enzyme on different synthesized DNA types (single and double-

432 stranded DNA), each DNA type was tested here three time and no effect was observed. **(B)**:  
433 Effect of MetbaB enzyme on extracted bacterial RNA (*E. coli* BL21) in presence and absence  
434 of sulbactam (a  $\beta$ -lactamase inhibitor). The bacterial RNA was not degraded when incubated  
435 only with water and RNase buffer. In contrast, this bacterial RNA was degraded when  
436 incubated with MetbaB enzyme alone or in presence of sulbactam. Presented gels in this  
437 figure are from different parts of the same gel **(C)**: confirmation of the RNase activity of  
438 MetbaB enzyme using the RNaseAlert QC system kit. The RNase activity is estimated  
439 according to the accumulated relative fluorescence during the time (here during one hour).  
440 The initial volacity of the enzyme was also determied.

441 **Figure 4:** Phylogenetic Tree of Class C  $\beta$ -lactamases and DD-peptidases proteins (penicillin  
442 binding proteins). The class A  $\beta$ -lactamases is used as root.



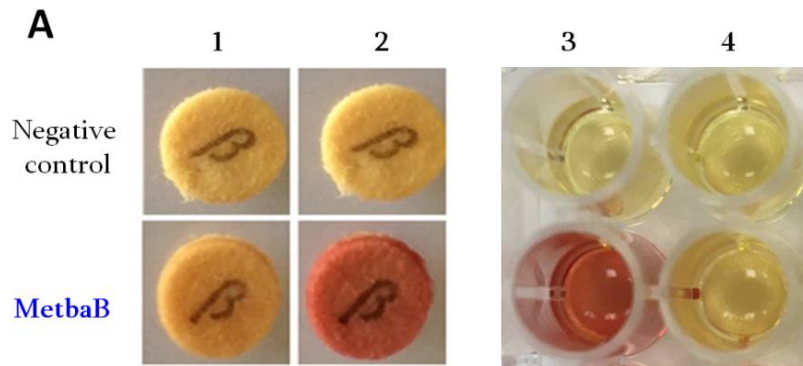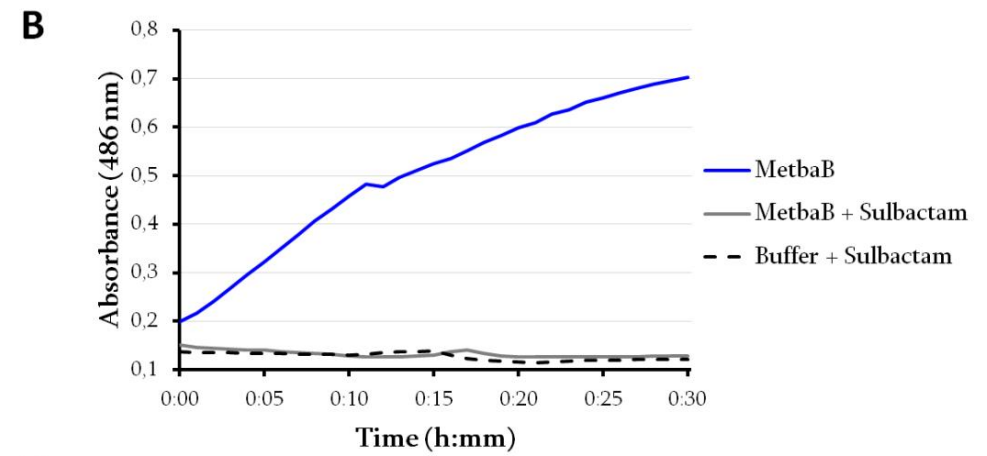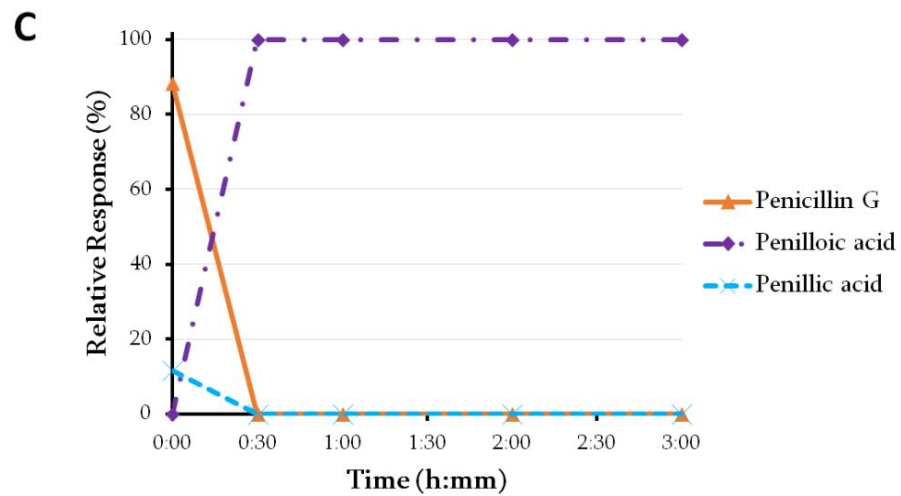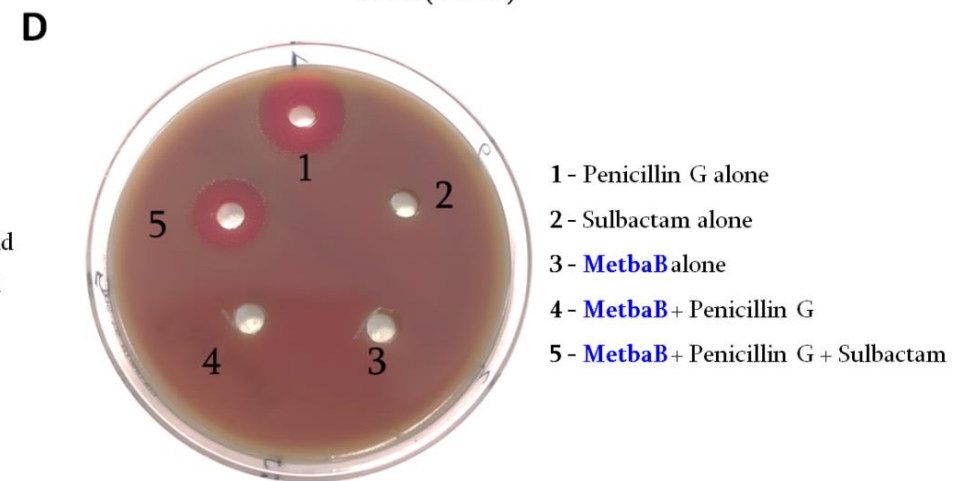

444

445 **Figure 2.**

446

A

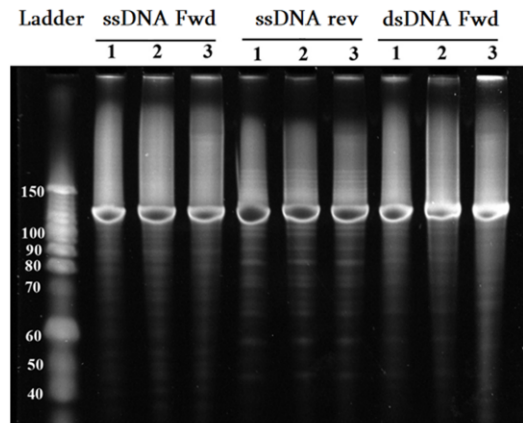

B

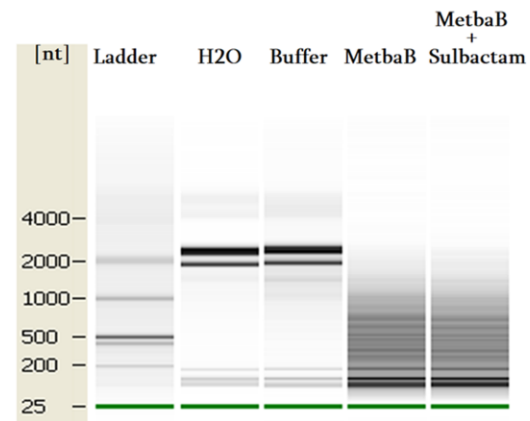

C

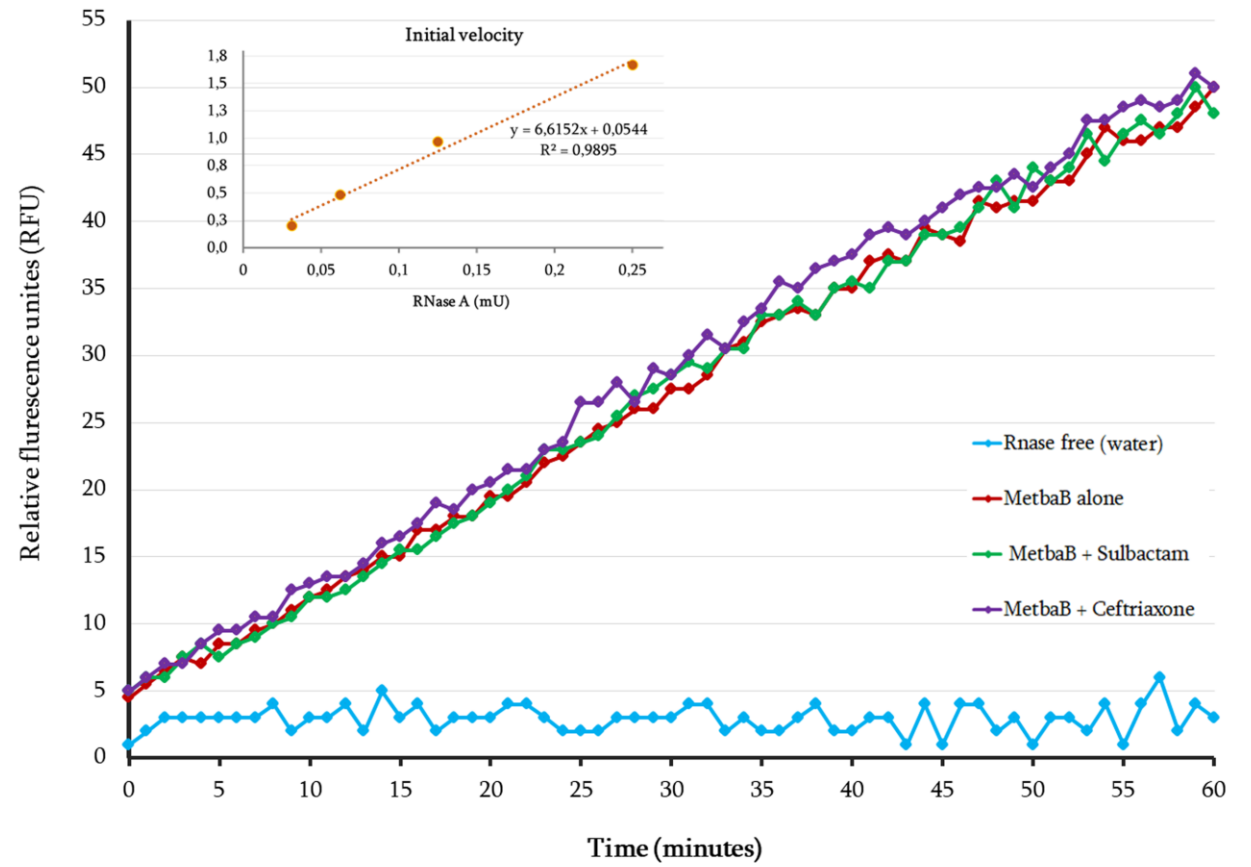

447

448 **Figure 3**

449

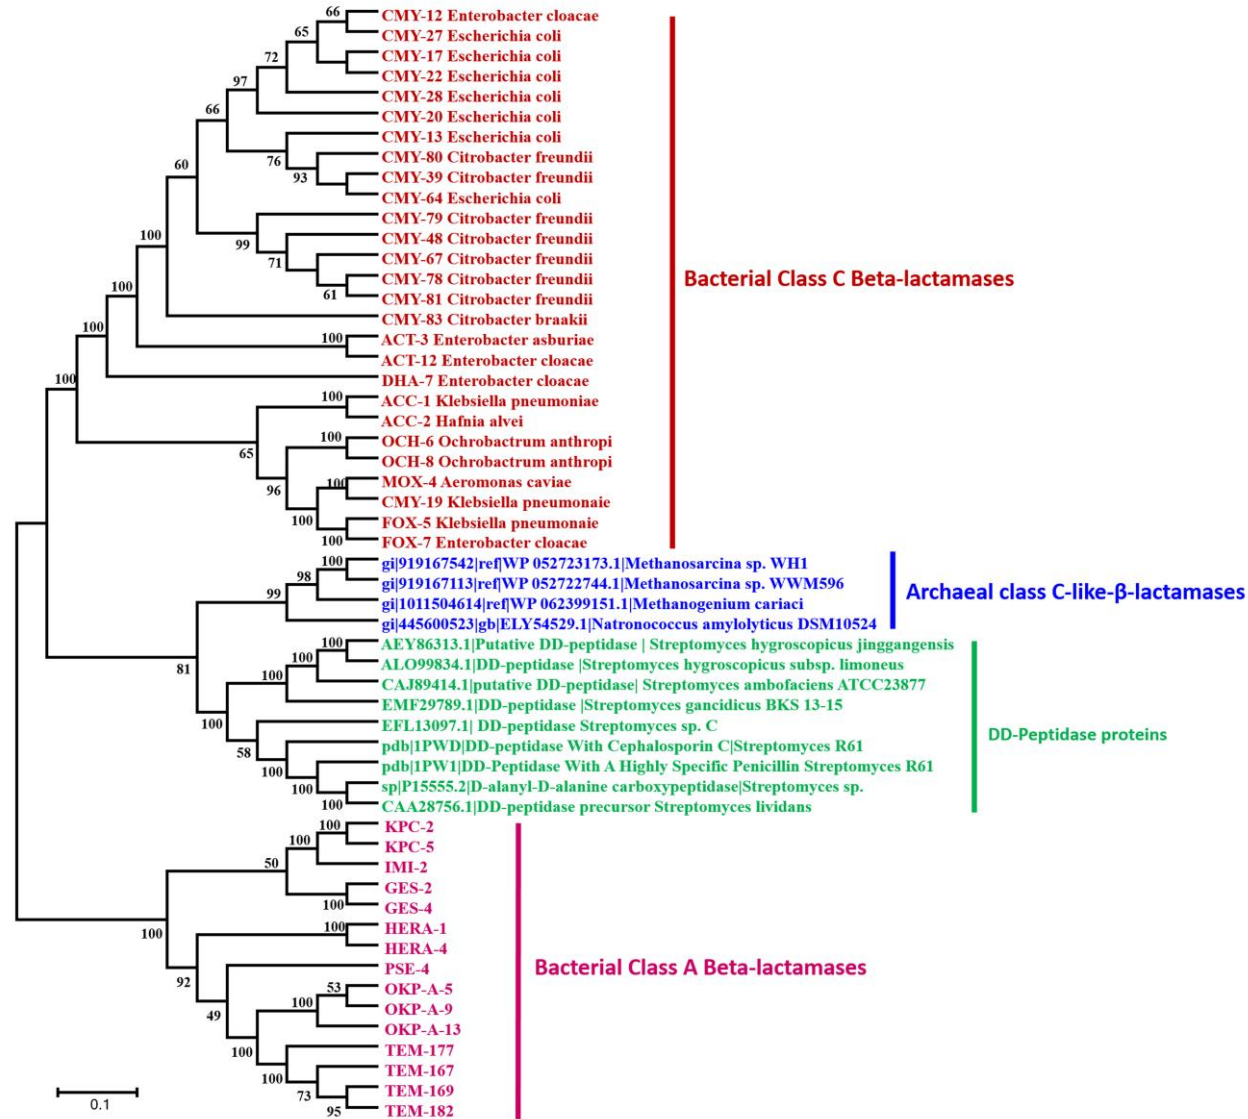

450

451 **Figure 4.**
